# Supplementary material
Source: PubMed Central journal article supplement (PMC6796952)
Supplement: 41422_2019_157_MOESM1_ESM.pdf [file 41422_2019_157_MOESM1_ESM.pdf]

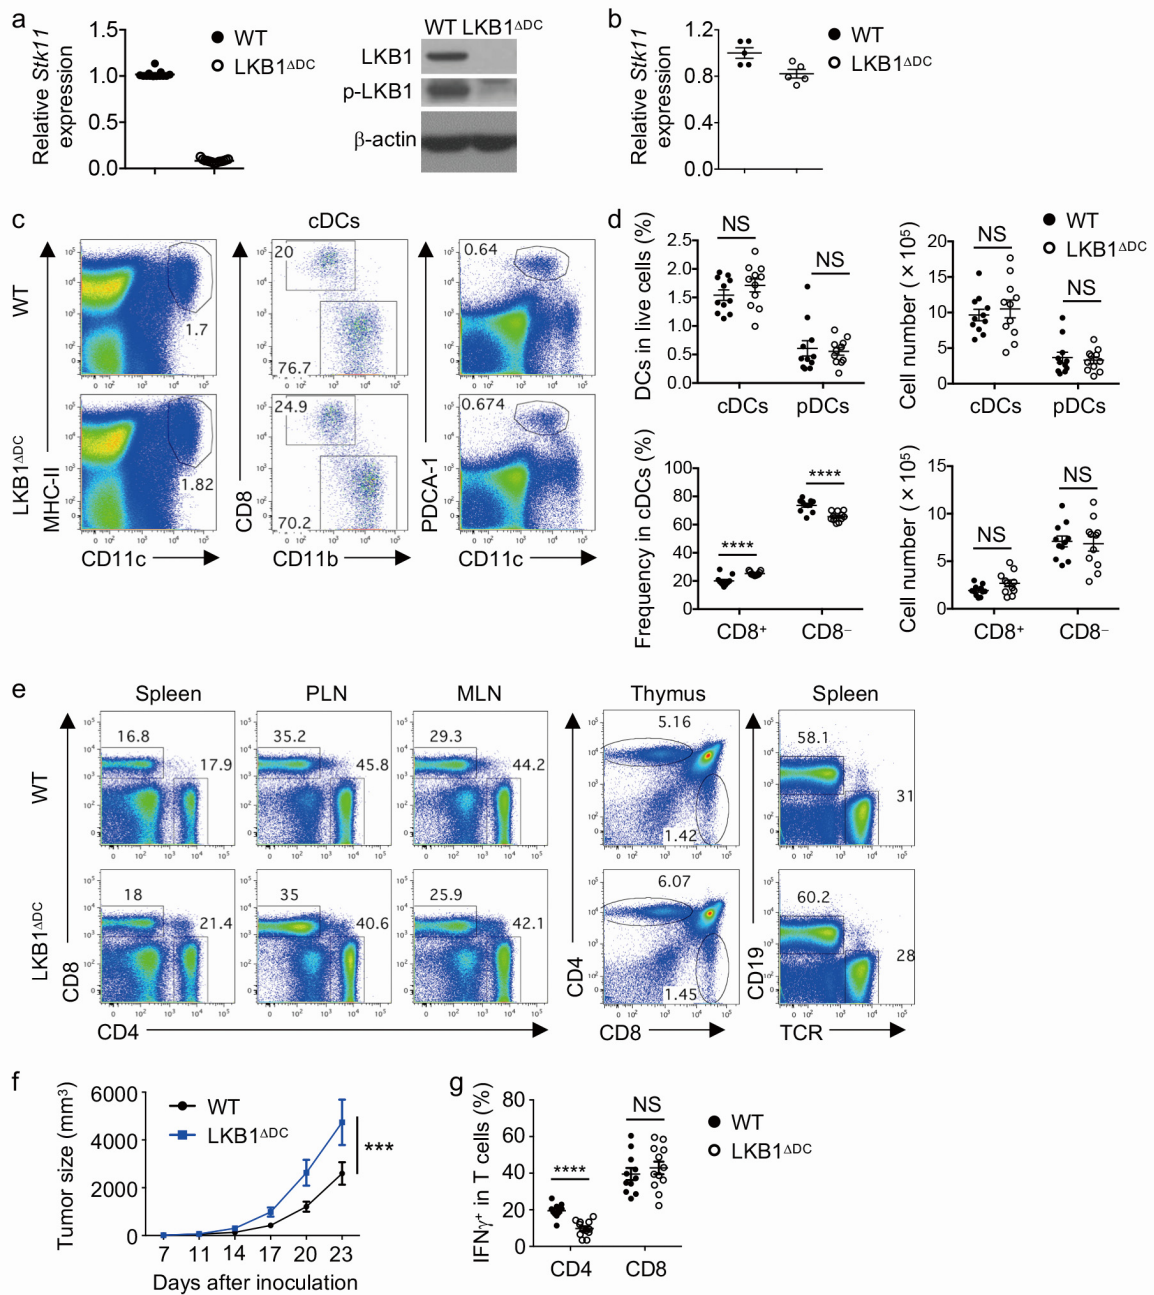

**Supplementary information, Figure S1. LKB1 deficiency does not affect the development of DCs, T cells or B cells.** **a**, Real-time PCR and immunoblot analyses of *Stk11* mRNA and LKB1 protein expression in splenic DCs (CD11c<sup>+</sup>MHC-II<sup>+</sup>TCR $\beta$ -CD19-CD49b<sup>-</sup>) from WT and *LKB1*<sup>ΔDC</sup> mice. **b**, Real-time PCR analysis of *Stk11* mRNA expression in splenic CD11b<sup>+</sup>F4/80<sup>+</sup> macrophages from WT and *LKB1*<sup>ΔDC</sup> mice. **c**, Flow cytometry analysis of splenic conventional DC (cDC), CD8 $\alpha$ <sup>+</sup> cDC (CD8 $\alpha$ <sup>+</sup>CD11b<sup>-</sup>), CD8 $\alpha$ <sup>-</sup> cDC (CD8 $\alpha$ <sup>-</sup>CD11b<sup>+</sup>) and pDC populations in WT and *LKB1*<sup>ΔDC</sup> mice. **d**, Statistics of frequencies and cell numbers of splenic DC populations in WT and *LKB1*<sup>ΔDC</sup> mice. **e**, Flow cytometry analysis of CD4<sup>+</sup> and CD8<sup>+</sup> T cell populations in the spleen, PLN, MLN and thymus, and B cells in the spleen of WT and *LKB1*<sup>ΔDC</sup> mice. **f**, Tumor growth curve in WT and *LKB1*<sup>ΔDC</sup> mice following inoculation of B16-OVA tumor cells (WT, *n* = 9; *LKB1*<sup>ΔDC</sup> mice, *n* = 7). **g**, Statistics of frequencies of IFN $\gamma$ -producing CD4<sup>+</sup> and CD8<sup>+</sup> T cells in tumor tissues of WT and *LKB1*<sup>ΔDC</sup> mice after inoculation of MC38 tumor cells for 13-14 days. Data in plots indicate the means  $\pm$  s.e.m; each symbol represents an individual mouse. Numbers in gates indicate percentage of cells. NS, not significant; \*\*\*\**P* < 0.0001; \*\*\*\**P* < 0.0001; two-tailed Mann-Whitney test (d, frequency; g), two-tailed unpaired Student's *t* test (d, cell number) or two-way ANOVA (f). Data are from at least three (a-e, g) independent experiments.
