# Supplementary material
Source: PubMed Central journal article supplement (PMC6796952)
Supplement: 41422_2019_157_MOESM2_ESM.pdf [file 41422_2019_157_MOESM2_ESM.pdf]

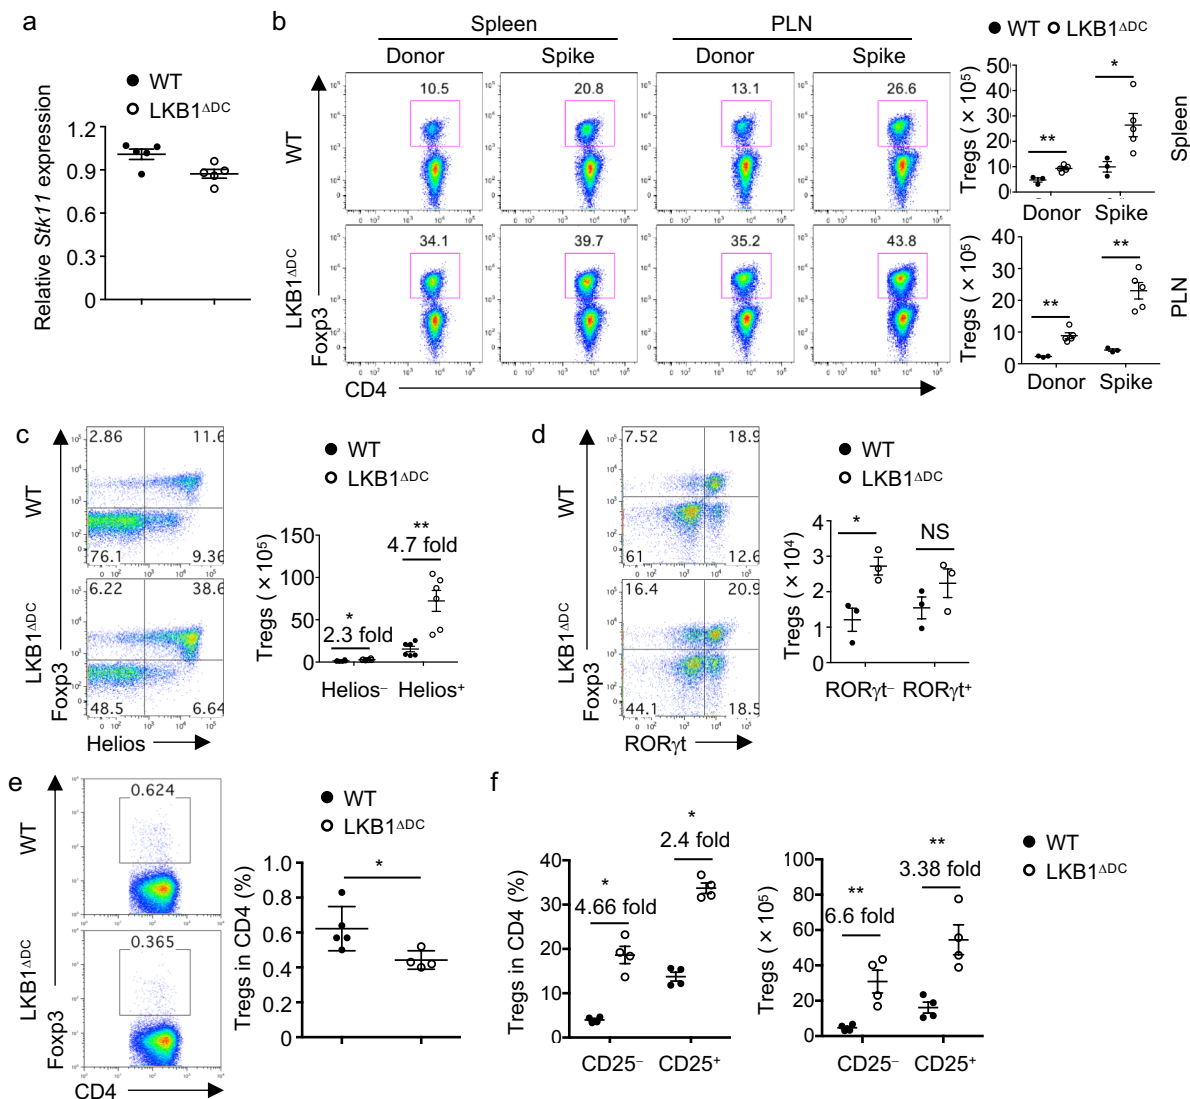

**Supplementary information, Figure S2. LKB1 deficiency in DCs mainly promotes tTreg expansion in a cell-intrinsic and dominant manner.** **a**, Real-time PCR analysis of *Stk11* mRNA expression in CD4<sup>+</sup>CD25<sup>+</sup> Tregs from WT and LKB1<sup>ADC</sup> mice. **b**, Flow cytometry analysis and statistics of cell numbers of CD45.1.2<sup>+</sup> spike bone marrow cell-derived and CD45.2.2<sup>+</sup> WT or LKB1<sup>ADC</sup> donor bone marrow cell-derived Foxp3<sup>+</sup>CD4<sup>+</sup> Tregs in the spleen of mixed chimeras. **c**, Flow cytometry analysis of Foxp3 and Helios expression and statistics of cell number of Helios<sup>-</sup> and Helios<sup>+</sup> Tregs in the spleen of WT and LKB1<sup>ADC</sup> mice. Numbers in the statistics graph indicate fold changes of LKB1<sup>ADC</sup> vs WT mice. **d**, Flow cytometry analysis of Foxp3 and RORγt expression and statistics of cell number of RORγt<sup>-</sup> and RORγt<sup>+</sup> Tregs in the colon lamina propria (LP) of WT and LKB1<sup>ADC</sup> mice. **e**, Flow cytometry analysis of Foxp3 expression and statistics of Treg frequency in naïve OT-II CD4<sup>+</sup> T cells cultured with splenic DCs from WT and LKB1<sup>ADC</sup> mice for 5 days. **f**, Statistics of frequencies and cell numbers of CD25<sup>-</sup> and CD25<sup>+</sup> Treg subsets in the spleen of WT and LKB1<sup>ADC</sup> mice. Numbers in the statistics graph indicate fold changes of LKB1<sup>ADC</sup> vs WT mice. Numbers in gates or quadrants indicate percentage of cells. NS, not significant; \**P* < 0.05, \*\**P* < 0.01; two-tailed unpaired Student's *t* test (b–d; f, cell number) or two-tailed Mann-Whitney test (e; f, frequency). Data are from at least two independent experiments (a–f).
