# Supplementary material
Source: PubMed Central journal article supplement (PMC6796952)
Supplement: 41422_2019_157_MOESM5_ESM.pdf [file 41422_2019_157_MOESM5_ESM.pdf]

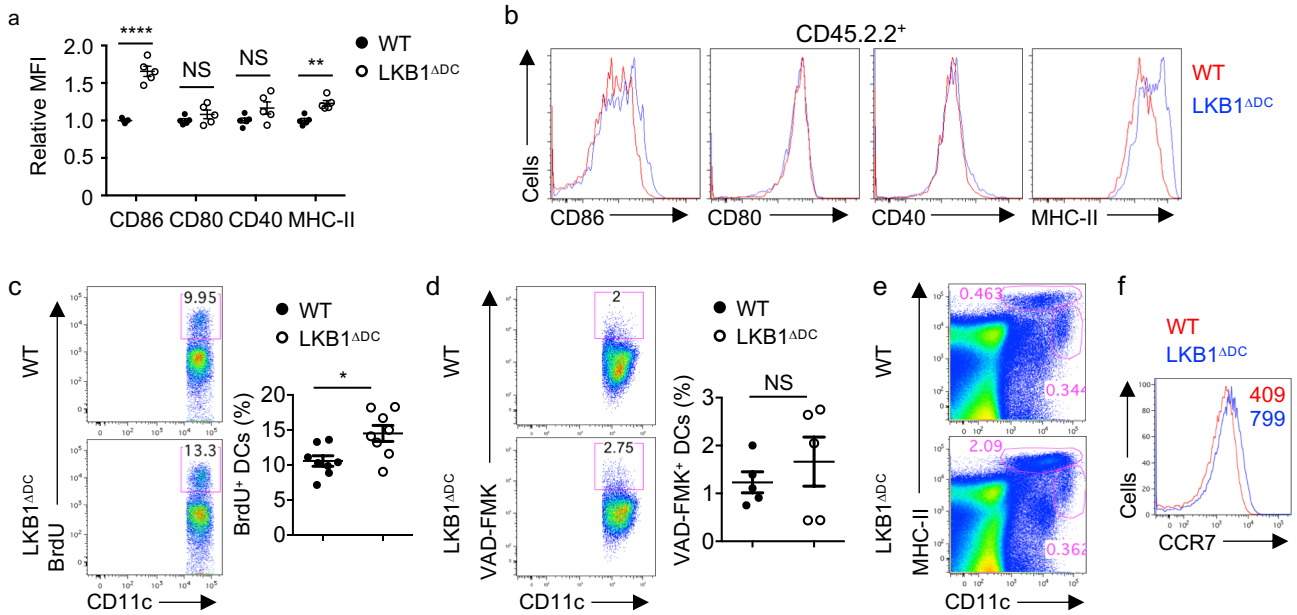

**Supplementary information, Figure S5. LKB1 controls DC maturation and proliferation.** **a**, Statistics of relative mean fluorescence intensity (MFI) of CD86, CD80, CD40 and MHC-II expression on thymic DCs from WT and LKB1 $\Delta$ DC mice. **b**, Flow cytometry analysis of CD86, CD80, CD40 and MHC-II expression on CD45.2.2<sup>+</sup> WT or LKB1 $\Delta$ DC donor bone marrow cell-derived splenic DCs in mixed chimeras. **c**, Flow cytometry analysis (left) and statistics (right) of BrdU incorporation in splenic DCs from WT and LKB1 $\Delta$ DC mice. **d**, Flow cytometry analysis of caspase activity in splenic DCs assessed with FITC-VAD-FMK (left) and statistics of the frequency of apoptotic VAD-FMK<sup>+</sup> splenic DCs (right) from WT and LKB1 $\Delta$ DC mice. **e**, Flow cytometry analysis MHC-II and CD11c expression on PLN DCs from WT and LKB1 $\Delta$ DC mice. **f**, Flow cytometry analysis CCR7 expression on splenic DCs from WT and LKB1 $\Delta$ DC mice. Data in plots indicate the means  $\pm$  s.e.m; each symbol represents an individual mouse. Numbers in gates indicate percentage of cells; numbers in graphs indicate the MFI. NS, not significant; \* $P < 0.05$ ; \*\* $P < 0.01$ , \*\*\*\* $P < 0.0001$ ; two-tailed unpaired Student's  $t$  test (a) or two-tailed Mann-Whitney test (c, d). Data are from two (a), three (b, d–f) or four (c) independent experiments.
